# Supplementary material for: Unravelling the adsorption and electroreduction performance of CO2 and N2 over defective and B, P, Si-doped C3Ns: a DFT study
Source: Royal Society of Chemistry journal article supplement (doi:10.1039/d3cp02106h), 2023-01-01
Supplement: d3cp02106h1.pdf [file d3cp02106h1.pdf]

## Unravelling the adsorption and electroreduction performance of CO<sub>2</sub> and N<sub>2</sub> over defective and B, P, Si-doped C<sub>3</sub>Ns: a DFT study

Dandan Wang,<sup>a,‡</sup> Xueting Liu,<sup>a,‡</sup> Huiru Yang,<sup>a</sup> Ziang Zhao,<sup>a</sup> Yucheng Liu,<sup>a</sup> Xin Qu,<sup>a</sup> Lihua Yang,<sup>a</sup> Ming Feng,<sup>\*a</sup> Zaicheng Sun<sup>\*b</sup>

<sup>a</sup> Key Laboratory of Functional Materials Physics and Chemistry of Ministry of Education, College of Physics, Jilin Normal University, Changchun 130103, China

<sup>b</sup> Center of Excellence for Environmental Safety and Biological Effects, Beijing Key Lab for Green Catalysis and Separation, Department of Chemistry, Faculty of Environment and Life, Beijing University of Technology, 100 Pingleyuan, Beijing 100124, China

<sup>‡</sup>These authors contributed equally to this work.

\*Corresponding authors emails: [mingfeng@jlnu.edu.cn](mailto:mingfeng@jlnu.edu.cn) (M. Feng), [sunzc@bjut.edu.cn](mailto:sunzc@bjut.edu.cn) (Z. Sun)

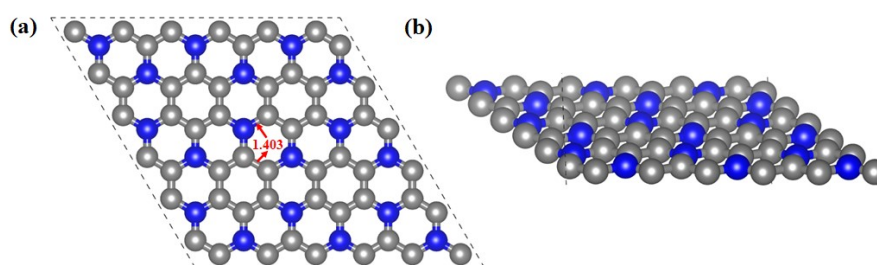

**Fig. S1** Top and side views of optimized pri-C<sub>3</sub>N structure. The grey and blue balls represent C and N atoms, respectively.

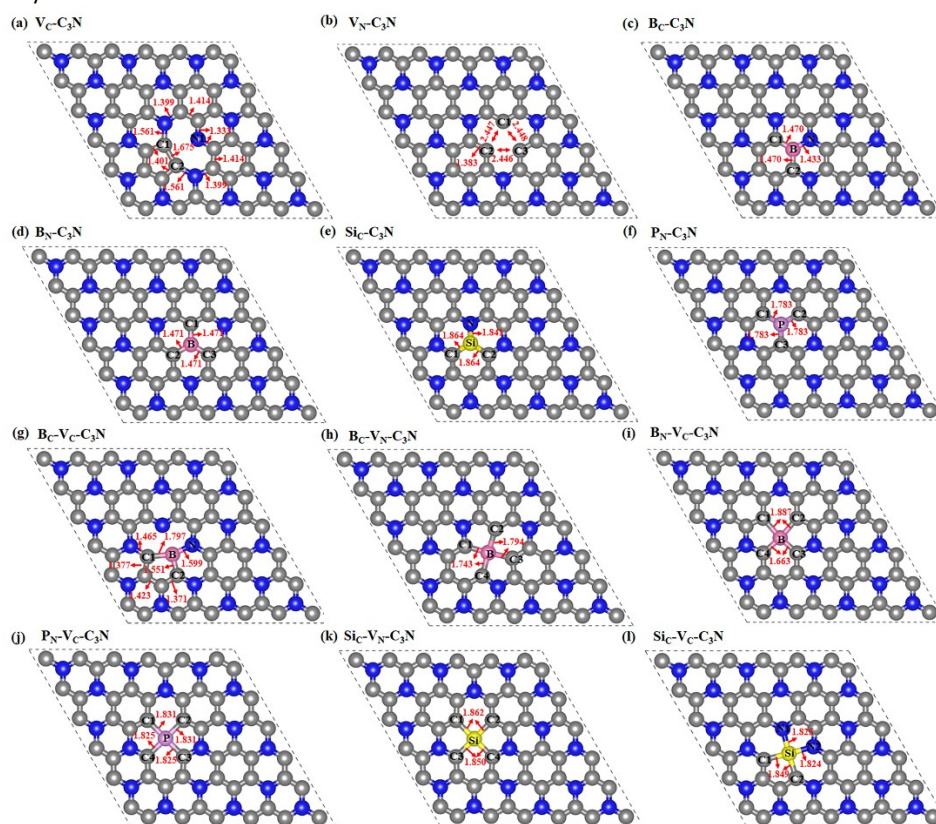

**Fig. S2** Top views of optimized defective and doped C<sub>3</sub>N structures with (a) V<sub>C</sub>, (b) V<sub>N</sub>, (c) B<sub>C</sub>, (d) B<sub>N</sub>, (e) Si<sub>C</sub>, (f) P<sub>N</sub>, (g) B<sub>C</sub>-V<sub>C</sub>, (h) B<sub>C</sub>-V<sub>N</sub>, (i) B<sub>N</sub>-V<sub>C</sub>, (j) P<sub>N</sub>-V<sub>C</sub>, (k) Si<sub>C</sub>-V<sub>N</sub> and (l) Si<sub>C</sub>-V<sub>C</sub>. The grey, blue, pink, yellow and purple balls represent C, N, B, Si and P atoms, respectively.

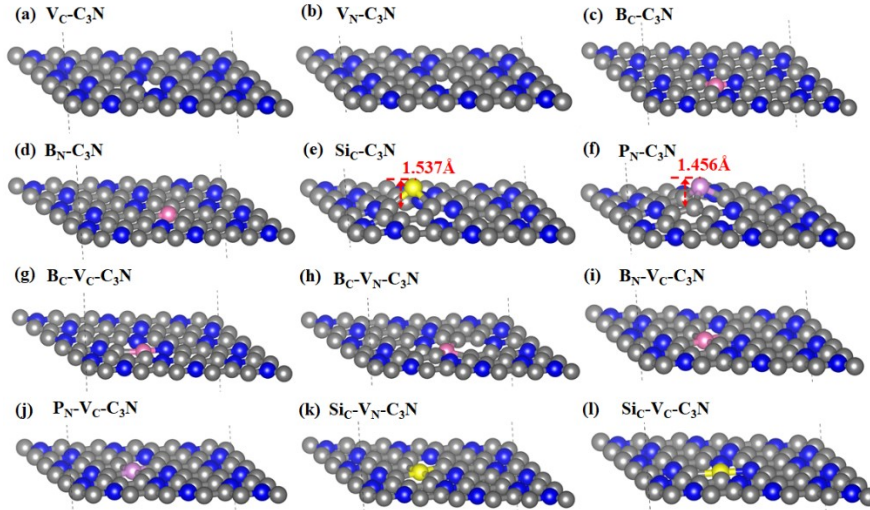

**Fig. S3** Side views of optimized defective and doped  $C_3N$  structures with (a)  $V_C$ , (b)  $V_N$ , (c)  $B_C$ , (d)  $B_N$ , (e)  $Si_C$ , (f)  $P_N$ , (g)  $B_C-V_C$ , (h)  $B_C-V_N$ , (i)  $B_N-V_C$ , (j)  $P_N-V_C$ , (k)  $Si_C-V_N$  and (l)  $Si_C-V_C$ . The grey, blue, pink, yellow and purple balls represent C, N, B, Si and P atoms, respectively.

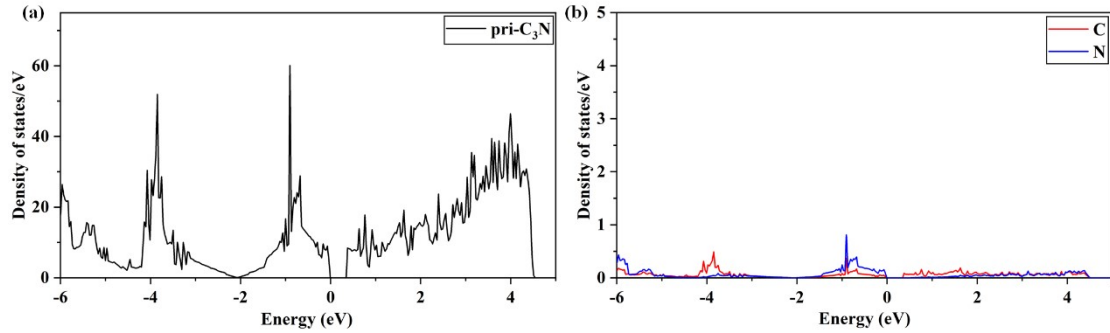

**Fig. S4** (a) The total density of states (TDOS) plots for  $pri-C_3N$ , (b) The partial total density of states (PDOS) plots for one C and one N atom of  $pri-C_3N$ . The Fermi level was assigned at 0 eV.

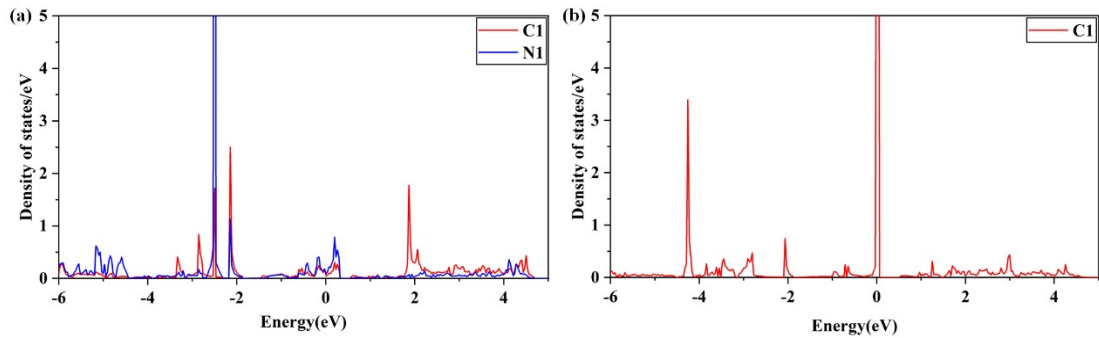

**Fig. S5** PDOS plots for (a) C1 and N atoms at  $V_C$  site of  $V_C-C_3N$ , (b) C1 atom at  $V_N$  site of  $V_N-C_3N$ . The Fermi level was assigned at 0 eV. The atoms labelled by numbers in this diagram correspond to those in **Fig. 1**.

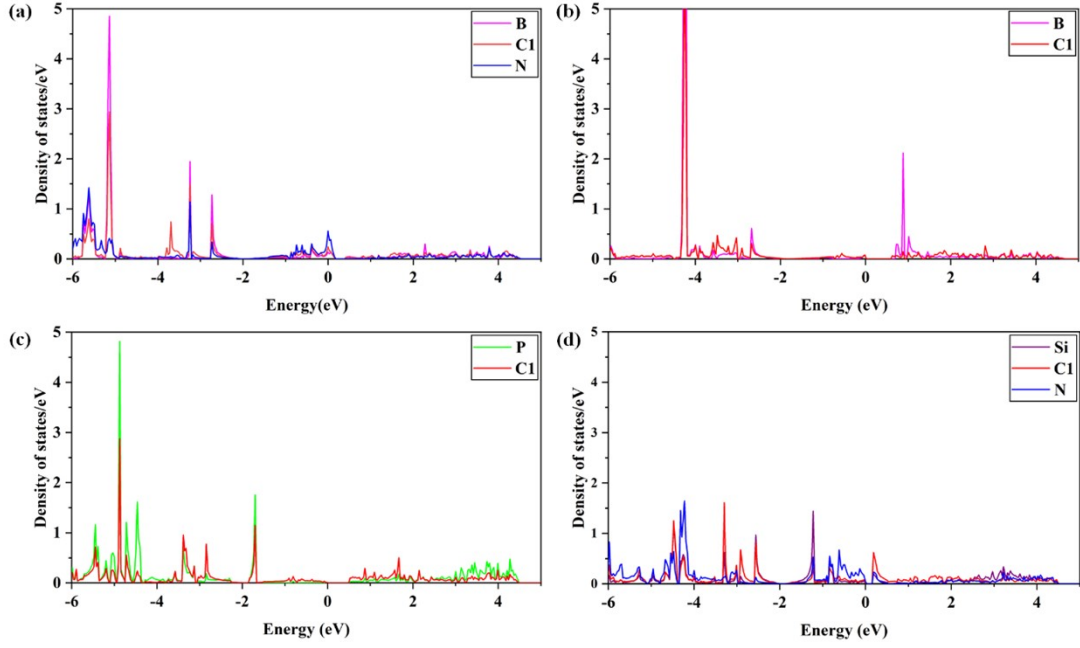

**Fig. S6** PDOS plots for (a) B, C1 and N atoms at  $B_C$  site of  $B_C-C_3N$ , (b) B and C1 atom at  $B_N$  site of  $B_N-C_3N$ , (c) P and C1 atoms at  $P_N$  site of  $P_N-C_3N$ , (d) Si, C1 and N atom at  $Si_C$  site of  $Si_C-C_3N$ . The Fermi level was assigned at 0 eV. The atoms labelled by numbers in this diagram correspond to those in **Fig. 1**.

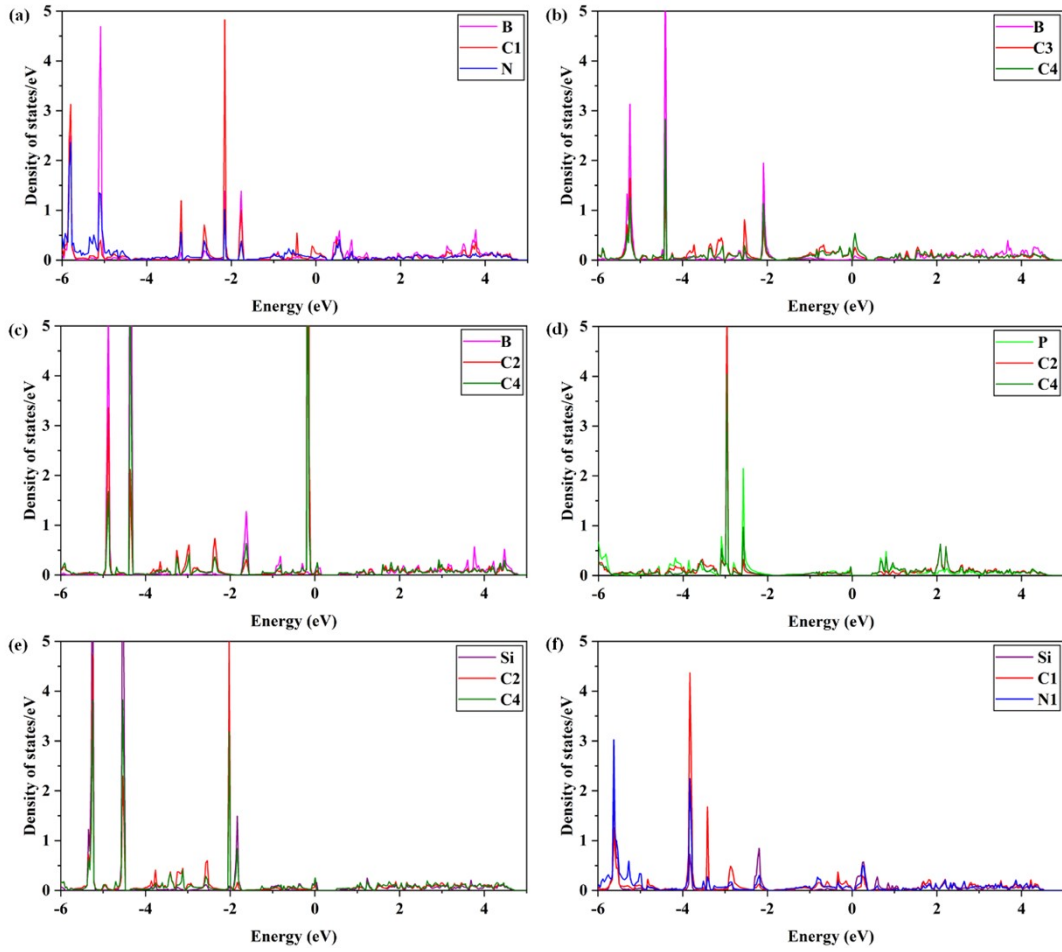

**Fig. S7** PDOS plots for (a) B, C1 and N atoms at defect site of  $B_C-V_C-C_3N$ , (b) B, C3, and C4 atom at defect site of  $B_C-V_N-C_3N$ , (c) B, C2, and C4 atoms at defect site of  $B_N-V_C-C_3N$ , (d) P, C2, and C4 atoms at defect site of  $P_N-V_C-C_3N$ , (e) Si, C2 and C4 atoms at defect site of  $Si_C-V_N-C_3N$ , (f) Si, C1 and N1 atoms at defect site of  $Si_C-V_C-C_3N$ . The Fermi level was assigned at 0 eV. The atoms labelled by numbers in this diagram correspond to those in **Fig. 1**.

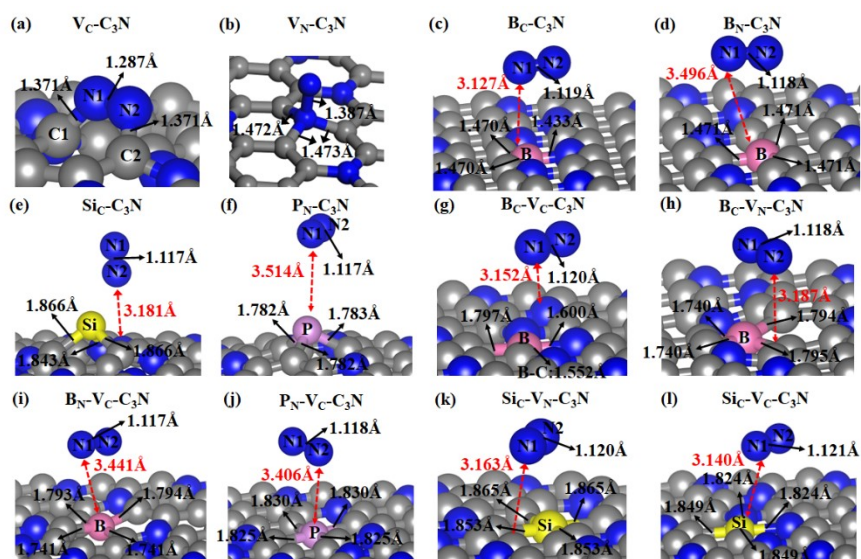

**Fig. S8** The optimized structures for the most stable  $N_2$  adsorption configurations on (a)  $V_C-C_3N$ , (b)  $V_N-C_3N$ , (c)  $B_C-C_3N$ , (d)  $B_N-C_3N$ , (e)  $Si_C-C_3N$ , (f)  $P_N-C_3N$ , (g)  $B_C-V_C-C_3N$ , (h)  $B_C-V_N-C_3N$ , (i)  $B_N-V_C-C_3N$ , (j)  $P_N-V_C-C_3N$ , (k)  $Si_C-V_N-C_3N$  and (l)  $Si_C-V_C-C_3N$ . The grey, blue, pink, yellow and purple balls represent C, N, B, Si and P atoms, respectively.

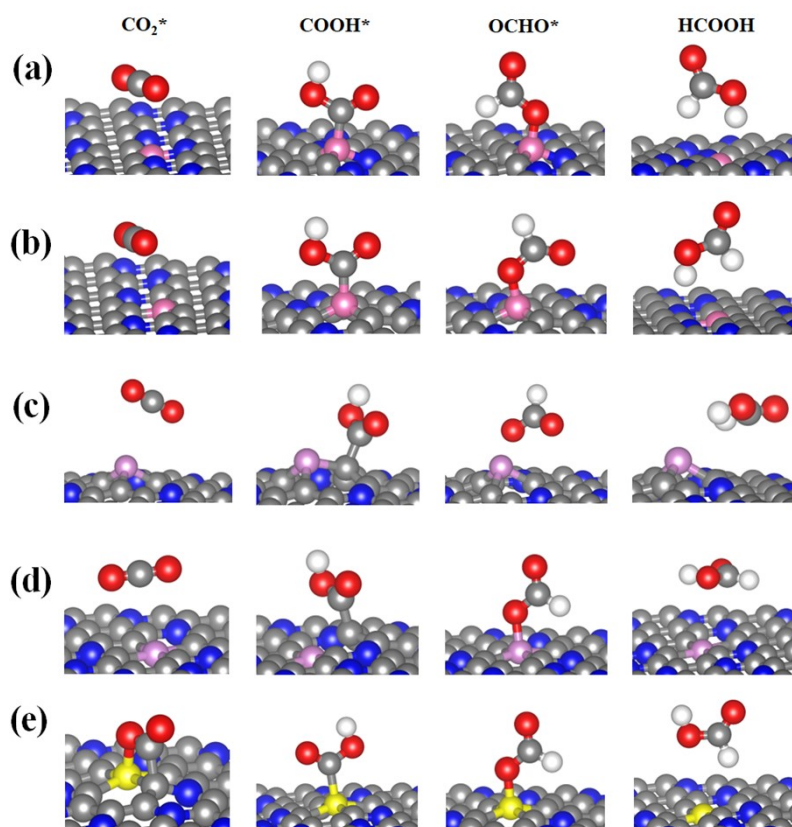

**Fig. S9** The optimized structures of the intermediates in electrocatalytic  $CO_2RR$  towards  $HCOOH$  on (a)  $B_C-C_3N$ , (b)  $B_N-C_3N$ , (c)  $P_N-C_3N$ , (d)  $P_N-V_C-C_3N$ , (e)  $Si_C-V_N-C_3N$ . The grey, blue, pink, yellow and purple balls represent C, N, B, Si and P atoms, respectively.

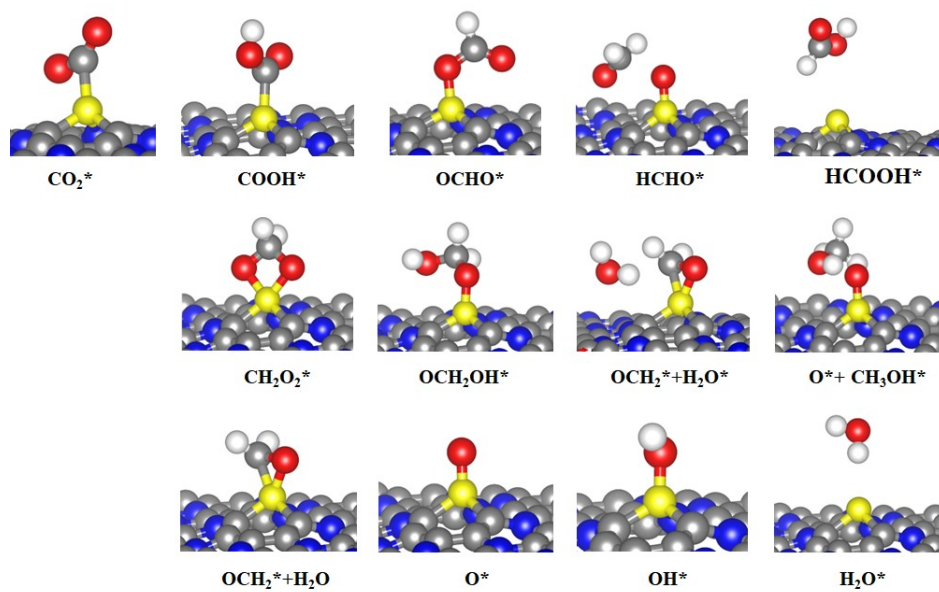

**Fig. S10** The optimized structures of the intermediates in electrocatalytic  $\text{CO}_2\text{RR}$  towards  $\text{CH}_3\text{OH}$  on  $\text{Si}_\text{C}\text{-C}_3\text{N}$ . The grey, blue, pink, yellow and purple balls represent C, N, B, Si and P atoms, respectively.
